# Supplementary material for: Chemical Group-Based Metabolome Analysis Identifies Candidate Plasma Biomarkers Associated With Residual Feed Intake in Beef Steers
Source: Frontiers journal article supplement (doi:10.3389/fanim.2021.783314), 2022-01-18
Supplement: Table_1.XLSX [file Table_1.XLSX]

## Sheet: Table S1
Table S1. Relative intensity values of amine/phenol-containing metabolites of the 16 steers
	1	2	3	4	5	6	7	8	9	10	11	12	13	14	15	16
1,4-diaminobutane	0.32	1.348	0.638	0.562	0.729	1.299	0.834	0.612	1.128	1.593	0.324	0.927	0.505	0.549	0.394	0.589
1-Methylguanine	1.748	1.41	1.024	1.356	1.262	1.551	1.086	1.078	1.444	1.541	1.171	1.551	1.43	1.197	1.478	1.489
1-Methylhistidine	0.939	0.919	0.868	0.832	1.252	0.603	0.975	1.099	0.777	1.213	0.899	1.131	1.069	0.908	1.119	1.071
2,4-Diaminobutyric acid	1.641	0.595	0.602	0.705	1.588	0.888	0.949	1.234	0.951	0.627	0.661	0.832	1.077	2.878	0.633	0.437
2-Aminobenzoic acid	1.515	1.427	1.21	1.361	1.052	1.068	1.123	0.97	1.252	1.337	1.173	1.41	1.08	1.127	1.211	1.34
2-Aminooctanoic acid	0.886	1.225	1.094	1.52	0.668	0.922	1.501	0.969	1.613	1.119	0.706	0.841	1.307	1.238	0.984	1.201
3,4-Dihydroxybenzeneacetic acid	1.066	0.861	0.793	0.812	0.916	0.91	0.947	0.937	1.12	1.193	1.127	0.861	1.052	0.938	0.882	0.899
3-Aminoisobutanoic acid	0.848	0.932	1.14	0.919	1.229	1.008	1.013	0.746	1.299	0.943	0.613	1.662	0.976	0.792	1.107	0.714
4-Guanidinobutanoic acid	0.706	0.989	0.671	0.817	0.758	0.905	0.74	0.747	0.958	0.611	0.578	0.765	0.803	0.719	0.78	0.736
4-Hydroxybenzoic acid	0.982	0.986	1.031	1.197	0.733	0.757	1.04	1.065	0.852	0.785	1.046	1.044	0.903	0.797	0.922	0.758
4-Hydroxyproline	1.143	0.998	1.112	1.112	1.045	0.864	1.032	0.88	1.004	1.095	0.906	1.153	0.896	0.856	0.93	0.942
5-Aminolevulinic acid	1.099	1.181	1.094	1.034	1.015	1.025	1.007	0.932	1.125	1.05	0.954	1.089	1.015	1.012	1.327	1.121
Isomer of 5-Aminopentanoic acid	1.08	0.881	0.775	0.798	0.961	0.845	1.487	0.826	1.316	1.068	0.806	1.221	0.916	1.033	1.021	0.966
5-Hydroxylysine	1.014	1.139	1.309	1.092	1.155	0.974	1.149	0.955	0.946	1.113	0.961	0.973	0.914	0.984	1.134	1.091
5-Hydroxymethyluracil	0.748	0.968	0.706	1.026	0.834	0.565	0.832	0.779	0.634	0.71	1.007	0.559	0.856	0.584	0.78	0.555
Alanine	0.848	0.869	1.015	0.911	0.801	1.4	1.031	1.012	1.032	1.017	0.836	0.868	1.005	1.125	0.951	1.235
Alanyl-Alanine	0.868	0.781	0.93	0.794	1.198	0.82	1.451	1.05	1.031	0.868	1.103	0.991	1.255	1.029	0.888	0.949
Alanyl-Glutamine	1.009	0.807	0.85	0.744	0.95	0.924	0.936	0.973	1.052	1.161	0.869	1.025	0.971	1.014	1.013	1.21
Alanyl-Histidine	0.911	0.648	0.952	0.992	1.112	0.89	1.12	1.15	0.786	1.103	0.968	0.878	1.043	1.234	0.884	1.325
Alanyl-Valine	1.063	1.093	1.176	1.022	1.045	1.35	1.072	1.224	1.232	1.121	1.069	1	1.024	1.244	1.149	1.073
Alpha-aminobutyric acid	0.925	0.907	0.834	0.845	0.902	0.969	1.523	0.967	1.057	1.1	0.756	1.242	1.072	1.051	0.955	1.06
Aminoadipic acid	0.922	1.026	0.877	0.908	0.861	1.269	0.893	1.005	0.974	0.956	1.245	0.753	1.023	1.214	1.172	1.012
Arginine	1.015	1.049	1.115	0.993	1.036	0.97	0.899	1.253	0.942	0.879	1.202	0.937	1.111	0.983	1.011	0.911
Arginyl-Glutamic acid	1.01	1.148	1.12	1.049	1.153	0.824	0.888	1.218	0.96	0.776	1.187	0.956	0.913	0.902	0.932	0.844
Asparagine	1.073	1.167	1.245	1.26	1.013	1.097	1.132	1.247	1.237	1.143	1.071	1.159	1.117	0.942	0.909	0.855
Aspartic Acid	0.743	1.069	0.987	0.914	0.832	1.569	0.893	0.986	1.186	1.137	1.004	1.069	1.03	0.961	0.974	1.013
Aspartyl-Aspartate	1.105	1.292	1.001	1.154	0.974	1.252	0.919	1.016	0.981	1.01	1.053	1.105	1.133	1.006	0.896	0.875
Aspartyl-Glycine	1.098	1.151	1.034	1.16	1.282	1.139	1.001	1.176	1.18	1.118	1.101	1.191	1.051	1.044	1.032	1.063
Aspartyl-Isoleucine	1.17	1.113	0.972	1.325	1.329	1.093	1.082	1.199	1.016	0.893	1.06	1.321	0.923	1.066	1.066	1.131
Aspartyl-Threonine	1.038	0.921	0.894	1.037	1.123	0.943	0.895	0.958	0.935	0.85	0.887	1.264	0.957	1.239	1.038	1.268
Beta-Leucine	1.242	1.054	1.233	1.374	1.202	0.6	1.022	1.208	0.982	1.522	1.12	1.534	1.256	1.174	1.009	1.089
Biopterin	0.944	0.801	0.813	0.845	1.044	0.774	1.022	1.075	0.754	0.955	1.115	0.626	0.856	0.822	0.863	0.734
Citrulline	1.065	1.031	1.056	0.993	0.92	0.968	0.786	0.953	1.046	1.086	1.053	1.063	1.04	0.982	1.25	1.052
Creatine	0.935	0.831	0.906	0.827	1.175	0.902	1.004	1.145	1.098	1.141	1.045	1.073	0.901	0.937	1.138	1.051
Cystathionine	0.945	1.212	1.209	0.98	0.99	1.298	1.127	1.033	0.725	1.224	0.844	0.831	0.993	0.925	1.103	0.927
Cysteinyl-Glycine	1.172	1.248	1.336	0.809	1.341	0.94	0.718	1.029	1.336	0.736	1.178	0.862	0.806	1.029	0.529	0.972
Cystine	1.074	1.049	1.155	1.221	1.054	1.155	1.136	1.068	0.697	1.359	1.031	0.909	1.017	1.093	1.131	0.897
Desaminotyrosine	1.035	0.809	0.92	0.901	1.064	0.883	1.045	0.684	1.55	0.921	1.816	0.755	1.268	0.696	1.286	0.631
Diaminopimelic acid	0.942	0.932	1.128	1.01	1.005	1.039	0.97	1.096	0.685	1.38	0.78	1.045	1.083	0.903	1.175	1.072
Gamma-Aminobutyric acid	0.91	0.937	0.832	0.958	0.793	0.973	1.03	0.981	1.125	1.217	0.821	1.09	0.968	0.901	0.971	0.851
Gamma-Glutamylglutamic acid	1.056	0.851	0.903	0.725	0.876	1.713	0.972	0.855	0.924	0.721	1.007	0.875	1.174	1.445	1.059	0.986
Gentisic acid	0.457	0.641	1.199	1.22	0.984	0.829	1.165	0.942	0.808	1.07	1.033	1.056	0.358	0.843	0.895	2.254
Glutamic Acid	1.012	0.943	0.789	0.778	0.791	1.56	0.935	0.911	1.028	0.934	1.002	0.944	1.016	1.304	1.088	1.147
Glutamine	0.989	0.969	1.164	0.984	0.971	1.027	1.043	1.15	1.011	1.116	0.977	1.161	0.897	0.868	0.823	0.882
Glutaminyl-Alanine	0.921	1.149	0.714	1.114	1.293	1.03	1.02	1.095	0.811	1.225	0.899	1.025	1.163	0.951	0.905	1.484
Glutaminyl-Glutamic acid	1.124	0.955	1.335	1.12	1.223	0.854	1.136	1.029	0.958	0.947	0.992	0.977	0.834	0.926	0.839	0.8
Glutamyl-Asparagine	1.04	1.072	1.257	0.94	1.051	0.932	0.956	1.138	1.244	1.03	1.036	1.224	0.89	1.017	0.943	0.811
Glutamyl-Glutamine	1.11	0.917	1.397	1.116	1.166	0.833	1.132	1.045	0.984	0.935	1.059	0.971	0.836	0.928	0.853	0.776
Glutamyl-Glycine	1.029	1.147	1.07	1.161	1.154	1.165	1.011	1.225	1.2	1.002	1.149	1.324	0.806	1.116	0.963	1.233
Glutamyl-Serine	1.004	1.093	0.945	0.922	1.256	0.996	0.742	0.938	1.315	0.82	0.87	1.486	0.968	1.096	0.98	0.939
Glycine	0.885	1.224	1.101	0.978	1	1.037	0.876	0.999	1.557	1.119	0.83	1.07	0.824	0.9	1.252	0.931
Glycyl-Glutamine	1.06	0.939	1.041	1.001	1.138	1.061	1.022	0.956	1.028	0.994	1.084	1.069	0.762	0.863	0.776	0.936
Glycyl-Leucine	0.565	0.61	1.109	0.66	0.864	1.854	0.546	0.699	2.646	0.537	0.599	0.901	0.559	0.954	1.137	0.893
Glycyl-Proline	1.01	1.061	0.915	1.042	1.011	0.805	1.408	1.136	1.45	1.093	0.781	0.985	1	1.199	1.166	0.99
Guanidoacetic acid	1.007	0.869	1.044	1.043	0.943	0.852	0.729	0.969	1.24	1.141	0.831	1.536	1.078	0.941	0.96	0.867
Hippuric acid	0.849	0.762	0.809	0.847	0.712	0.911	0.732	1.037	0.789	0.941	0.656	1.063	0.689	0.74	0.684	0.979
Histidine	1.034	1.067	1.137	0.987	0.997	1.007	0.967	1.074	0.864	0.999	1.124	0.831	1.027	0.998	0.97	0.917
Histidinyl-Arginine	0.892	1.067	0.796	1	1.813	1.28	0.599	0.962	0.583	0.852	0.74	1.467	1.305	1.93	0.972	0.972
Histidinyl-Aspartate	0.836	0.777	0.874	1.078	1.022	0.74	0.771	0.905	0.974	0.965	0.792	0.884	0.82	0.896	0.951	0.916
Histidinyl-Glutamate	1.026	1.046	1.241	0.995	1.253	0.968	0.928	0.973	0.929	0.917	1.067	0.931	0.924	1.073	1.08	0.871
Homoarginine	1.008	0.844	0.948	0.997	1.118	1.126	1.221	1.002	0.757	0.902	1.343	0.937	1.056	0.862	0.866	0.899
Homocitrulline	1.116	0.827	0.813	0.766	1.243	0.778	0.856	1.152	0.883	1.202	0.876	1.205	0.795	0.813	1.113	1.073
Homogentisic acid	1.031	0.763	0.897	1.217	0.994	0.937	1.374	1.117	0.696	0.941	1.237	1.5	1.144	0.918	0.901	1.11
Homoserine	1	1.139	1.109	1.141	1.102	1.069	1.054	1.057	1.197	0.988	0.989	1.171	1.01	1.052	1.073	1.008
Homovanillic acid	1.526	0.88	0.913	1.095	0.958	1.036	0.967	0.998	0.954	0.974	1.11	1.126	1.045	0.833	1.001	1.027
Hydroxyphenyllactic acid	1.131	0.828	0.915	0.862	1.065	1.353	1.094	0.879	1.052	0.987	1.258	1.04	1.176	0.879	1.061	1.478
Imidazoleacetic acid	0.919	0.807	0.922	0.969	1.023	0.81	0.953	0.994	1.073	0.964	1.17	0.849	1.005	1.088	0.956	1.114
Indoleacrylic acid	1.045	0.833	1.339	0.997	0.652	1.156	1.021	0.916	0.846	0.721	1.25	0.879	0.831	0.951	1.093	1.083
Isoferulic acid	0.854	0.936	0.895	1.064	0.916	0.953	0.884	0.808	0.795	0.762	0.86	1.034	0.92	0.757	0.959	0.797
Isoleucyl-Alanine	1.626	1.875	1.711	1.782	2.106	1.672	2.139	1.921	1.514	1.223	1.68	1.675	1.837	1.633	1.404	1.533
Isoleucyl-Glutamate	1.303	0.87	0.928	1.093	0.95	1.005	1.197	0.951	1.301	1.237	1.086	1.186	0.91	0.933	0.754	0.794
Isoleucyl-Glycine	1.198	1.06	1.256	1.317	1.259	1.236	1.237	1.276	1.138	1.07	1.226	1.254	1.171	1.239	1	1.04
Isoleucyl-Tryptophan	0.821	0.774	0.842	0.84	1.592	0.948	0.54	0.507	0.758	0.572	0.629	1.849	0.979	1.097	0.758	0.991
Isomer 1 of Gamma-Aminobutyric acid	0.966	0.877	1.021	0.893	1.186	0.792	0.975	0.94	0.995	1.185	1.151	0.925	1.015	0.922	1.013	0.878
Isomer 1 of Homoserine	0.901	0.633	0.792	0.829	0.696	0.718	0.977	0.821	0.936	0.895	0.767	0.811	0.724	0.832	0.856	0.679
Isomer 1 of Valyl-Glutamate	1.285	0.802	0.611	0.584	1.249	0.465	1.427	1.374	1.231	0.976	1.554	1.099	1.391	1.096	0.879	0.819
Isomer 1 of Xanthurenic acid	1.419	1.016	0.99	1.193	1.412	1.048	0.832	0.891	0.944	1.101	0.854	1.374	1.392	1.002	0.703	1.247
Kynurenine	1.177	0.892	1.023	1.192	0.782	0.949	1.023	0.877	1.011	0.766	1.233	1.205	1.024	0.933	1.072	0.986
Leucine	0.948	0.944	1.076	0.992	0.974	0.995	1.116	1.09	0.944	0.955	0.965	0.947	0.929	1.147	1.069	1.069
Leucyl-Alanine	1.098	0.887	0.933	0.925	0.954	1.148	0.921	1.221	1.009	1.117	1.123	1.007	0.943	1.224	0.952	1.266
Leucyl-Glutamate	0.979	0.968	1.013	0.859	1.119	0.968	0.987	0.968	1.024	0.927	1.045	1.084	0.802	1.133	1.06	0.993
Leucyl-Glutamine	1.071	0.892	1.11	0.867	0.869	1.158	1.095	1.388	0.901	1.153	1.008	1.076	0.845	0.895	0.962	0.965
Leucyl-Isoleucine	0.871	0.825	0.719	0.86	1.237	0.962	0.613	0.736	0.663	0.596	0.693	1.092	0.918	1.103	0.688	1.08
Leucyl-Valine	0.914	0.831	0.916	1.131	1.074	1.2	1.091	1.341	0.982	1.084	1.208	1.125	1.023	1.291	1.086	0.958
Lysine	1.025	1	1.122	1.239	1.001	1.034	1.041	1.307	0.97	0.813	1.31	0.758	1.181	1.248	1.022	0.808
Lysyl-Proline	1.004	0.903	1.234	1.238	0.978	1.271	0.969	1.531	0.997	0.83	1.516	0.89	1.242	1.148	0.978	0.812
isomer 2 of Methionine	0.92	0.974	1.23	1.017	0.921	1.029	1.143	1.108	0.929	0.905	1.006	0.948	0.881	0.876	0.875	0.916
Methionine Sulfoxide	0.96	0.938	1.136	0.937	0.847	0.933	1.217	1.112	0.96	0.976	1.019	0.902	0.934	0.875	0.856	0.874
Methionyl-Alanine	0.997	0.928	0.866	0.821	0.788	0.962	0.963	1.097	0.844	0.999	0.843	0.814	0.817	0.972	0.903	0.869
Methionyl-Serine	1.243	0.83	0.791	0.828	0.881	0.827	0.963	1.132	1.008	1.21	1.278	1.114	1.115	0.961	1.075	0.85
Methylcysteine	1.189	0.97	1.003	1.045	0.838	1.15	1.152	1.167	0.803	1.179	0.765	0.95	1.072	0.938	1.046	0.952
Methylguanidine	0.871	0.759	0.893	0.858	0.933	0.731	0.891	0.807	0.914	1.022	0.788	1.106	0.925	0.845	0.875	0.942
N-Alpha-acetyllysine	1.03	0.903	0.974	1.106	1.159	1.106	0.928	0.988	1.099	1.059	1.058	1.052	1.181	0.915	1.248	1.007
N-Methyl-a-aminoisobutyric acid	1.072	1.038	1.056	1.155	1.043	1.161	1.114	1.131	1.072	1.096	1.064	1.037	1.057	1.202	1.164	1.134
Norleucine	0.95	0.943	1.077	0.991	0.967	0.993	1.115	1.09	0.955	0.953	0.968	0.948	0.931	1.144	1.068	1.07
O-Phosphoethanolamine	0.681	2.364	0.953	1.319	1.54	0.766	1.047	0.71	1.295	1.47	0.824	0.586	1.096	0.774	0.806	0.706
Ortho-Hydroxyphenylacetic acid	1.155	1.051	0.996	0.854	0.876	0.867	1.003	0.903	1.185	0.872	1.17	1.369	0.861	0.907	0.929	0.807
o-Tyrosine	0.585	1.309	0.817	0.65	1.093	0.574	1.021	1.106	1.149	1.256	1.634	0.71	0.722	0.613	1.316	1.013
p-Aminobenzoic acid	0.764	0.975	0.832	0.79	0.948	0.756	0.805	0.867	0.895	1.026	0.848	1.018	0.901	0.879	0.815	0.917
Phenylalanyl-Aspartate	0.974	0.937	1.08	1.341	1.072	0.952	1.213	1.05	1.044	1.01	0.898	1.072	1.049	0.891	1.044	1.127
Phenylalanyl-Glutamate	1.037	1.042	1.182	1.028	1.026	0.822	0.923	0.924	1.073	0.844	0.984	1.101	0.908	0.944	1.048	0.964
Proline	0.961	0.975	0.968	0.895	0.83	1.065	0.988	1.224	1.124	1.05	0.994	0.984	0.857	0.995	0.971	0.989
Prolyl-Alanine	0.928	0.856	1.103	1	0.794	1.726	1.09	1.571	1.202	1.124	1.208	0.982	1.069	1.244	0.935	1.459
Prolyl-Arginine	0.865	1.151	1.185	0.895	0.972	0.945	1.123	1.679	1.086	0.947	1.244	0.727	1.128	1.031	1.029	0.869
Prolyl-Aspartate	1.036	0.845	0.83	1.021	1.104	0.934	0.915	0.902	1.123	0.93	0.932	1.057	1.021	1.039	1.004	1.114
Prolyl-Glutamate	0.896	0.881	0.894	0.664	0.767	1.58	0.944	1.007	1.036	1.008	1.081	1.026	0.904	1.335	0.922	1.058
Prolyl-Glycine	0.974	1.105	1.21	0.973	1.062	1.218	0.888	1.219	1.548	1.113	1.072	1.127	0.888	0.962	1.138	1.049
Prolyl-Leucine	0.989	1.061	1.116	1.045	1.055	1.29	1.137	1.479	1.063	1.062	1.32	1.143	1.035	1.117	1.06	1.181
Prolyl-Lysine	0.905	0.777	0.952	1.243	0.836	1.222	1.03	1.373	0.867	0.808	1.559	0.837	0.956	1.048	0.929	0.764
Prolyl-Methionine	1.035	1.101	1.349	1.065	1.147	1.236	1.289	1.658	1.013	1.009	1.307	1.122	0.867	1.015	1.032	0.925
Prolyl-Serine	0.884	1.069	1.071	0.831	0.835	1.094	0.903	1.507	1.754	1.08	1.19	1.307	0.869	0.91	1.121	0.993
Prolyl-Threonine	1.226	0.969	1.148	1.012	1.031	1.388	1.086	1.556	1.179	1.04	1.363	0.759	0.983	1.427	0.879	1.008
Prolyl-Tyrosine	1.101	1.287	1.566	1.177	1.17	1.304	1.245	1.448	1.253	1.027	1.372	1.232	1.339	1.115	0.98	1.135
Prolyl-Valine	1.004	1.106	1.019	0.983	0.971	1.205	1.095	1.495	1.063	0.993	1.131	0.983	1.018	1.304	1.048	1.068
Protocatechuic acid	1.296	0.789	0.998	0.845	1.097	1.022	1.436	0.932	1.037	1.199	0.862	1.146	0.539	0.959	0.978	1.449
Pyrocatechol	1.033	1.058	0.985	0.927	1.019	0.946	0.993	0.873	0.853	0.981	1.061	0.859	0.904	0.886	0.959	0.9
Salicyluric acid	1.245	0.833	0.962	1.038	0.849	0.964	0.952	0.998	0.957	0.949	1.005	1.296	1.274	0.815	0.802	1.205
Sarcosine	0.882	1.144	1.022	1	0.936	1.413	1.368	1.041	1.138	1.101	0.789	1.062	1.009	0.996	0.985	1.148
Serotonin	0.142	0.474	1.963	0.492	0.208	3.11	0.219	0.29	3.467	0.24	0.247	0.274	0.129	1.462	1.538	1.785
Seryl-Aspartic acid	1.091	1.298	1.012	0.958	1.269	0.937	1.017	1.027	1.033	1.107	1.004	1.164	1.167	1.16	1.146	1.045
Seryl-Glycine	0.991	1.238	1.026	0.758	1.165	0.716	0.827	0.832	1.119	0.957	1.095	1.164	0.836	0.927	0.989	0.817
Symmetric dimethylarginine	0.992	0.915	1.082	0.994	1.059	0.928	0.968	0.923	1.028	1.113	0.937	1.19	0.938	0.835	0.967	0.949
Theophylline	0.843	0.943	0.731	0.661	1.067	0.841	0.852	1.07	1.315	0.728	0.831	1.169	0.86	0.809	1.084	0.933
Threoninyl-Aspartate	1.002	1.08	0.951	0.926	1.33	1.003	0.783	0.917	1.269	0.82	0.87	1.48	0.942	1.101	0.958	0.96
Threoninyl-Glutamate	1.122	1.077	1.08	1.052	1.022	1.128	0.944	1.164	1.186	0.958	1.114	0.899	0.989	1.016	0.967	0.959
Threoninyl-Glycine	0.941	1.219	0.787	1.004	1.254	1.003	0.999	0.843	1.18	0.746	0.797	1.586	0.891	1.181	0.7	1.123
Tryptophan	1.22	0.943	1.082	0.984	0.827	1.047	0.918	1.061	0.862	0.945	1.063	1.1	0.917	0.977	0.986	1.033
Uracil	0.774	0.915	1.031	0.71	0.818	1.149	0.762	0.767	1.125	0.696	0.765	0.811	0.633	1.041	0.802	1.245
Uridine	0.826	1.092	0.965	1.152	1.014	1.084	0.9	0.897	0.972	1.065	0.902	1.184	0.936	0.898	1.065	0.795
Valine	0.962	0.98	0.975	1.021	0.944	1.025	1.056	1.028	0.935	0.979	0.971	0.909	0.998	1.119	1.092	1.05
Valyl-Alanine	0.853	0.894	1.032	1.23	1.105	1.271	1.062	1.235	1.037	0.898	1.131	0.934	1.111	1.106	0.958	0.933
Valyl-Glutamate	0.997	0.988	0.883	0.842	1.034	0.91	0.948	0.999	1.149	1.02	0.972	1.131	0.921	1.094	1.085	1.077
Valyl-Glycine	1.015	1.014	1.269	1.338	1.319	0.721	1.41	1.003	1.195	0.94	1.089	1.171	1.227	0.927	0.771	0.849
Valyl-Lysine	0.992	0.938	1.174	0.951	0.989	1.426	1.193	1.248	1.181	0.986	1.287	0.862	0.939	1.448	1.143	0.86
Vanillic acid	2.02	1.01	0.85	1.186	1.106	1.144	0.922	0.909	0.957	0.977	0.916	1.012	1.276	0.89	0.915	0.984
Vanillylmandelic acid	1.647	0.988	1.169	1.073	1.106	1.102	0.997	1.047	0.974	1.114	1.13	1.175	1.337	0.961	1.096	1.135
Xanthurenic acid	0.508	0.448	1.551	0.577	0.221	3.654	0.25	0.244	3.953	0.295	0.253	0.358	0.622	1.336	1.199	2.195
(2R,2'S)-Isobuteine	1.227	1.143	1.48	1.869	1.484	1.77	1.698	0.909	0.752	1.033	1.47	1.27	1.811	0.789	0.878	0.709
(2R,3R,4R)-2-Amino-4-hydroxy-3-methylpentanoic acid	1.09	0.968	0.951	0.944	1.028	1.078	0.979	1.098	0.857	1.112	1.042	0.985	0.928	0.978	1.061	1.001
(3S)-3,6-Diaminohexanoic acid	0.948	1.032	1.084	1.139	1.057	1.012	1.184	1.278	0.756	1.203	0.723	0.827	1.298	1.105	1.324	1.31
(3S,5S)-3,5-Diaminohexanoic acid	1.031	0.999	1.185	1.2	1.037	1.017	1.103	1.377	0.972	0.867	1.369	0.821	1.212	1.336	1.096	0.872
(6R)-6-(L-Erythro-1,2-Dihydroxypropyl)-5,6,7,8-tetrahydro-4a-hydroxypterin	0.906	0.667	0.985	1.009	1.134	0.869	1.17	1.208	0.81	1.18	0.976	0.838	1.05	1.248	0.909	1.319
(R)-1-Aminopropan-2-ol	1.106	1.445	0.789	1.375	1.121	1.263	1.049	1.054	1.248	1.449	0.737	1.823	0.946	1.046	0.902	1.155
(R)-2-Feruloyl-1-(4-Hydroxyphenyl)-1,2-ethanediol	0.54	1.299	0.663	0.747	1.805	0.637	0.807	0.989	1.365	0.681	1.811	1.45	0.377	0.456	0.909	0.67
(S)-2-Azetidinecarboxylic acid	1.064	1.095	1.162	1.13	0.989	1.141	1.094	1.204	0.961	0.931	1.174	0.707	0.931	0.991	1.059	0.863
(S)-4-Amino-5-oxopentanoic acid	1.13	1.145	1.16	0.955	0.839	1.451	1.132	1.408	1.695	1.221	1.075	0.896	1.011	1.437	1.241	1.222
(S)-5-Amino-3-oxohexanoic acid	1.074	1	0.927	1.067	1.083	0.919	1.099	1.04	1.036	1.052	1.018	1.092	1.024	0.953	1.048	0.958
(S)-Norlaudanosoline - 2 tags / (R,S)-Norlaudanosoline	0.973	1.926	1.244	1.047	1.509	1.154	1.063	1.801	1.338	1.373	2.418	1.275	1.312	0.963	0.984	1.101
(Z)-3-Peroxyaminoacrylic acid	0.5	1.329	1.076	0.642	0.937	0.642	0.773	0.875	1.542	1.143	0.862	0.994	0.88	0.903	1.362	0.828
1,2-Dehydrosalsolinol	0.77	0.683	1.4	1.819	0.817	0.716	0.535	0.259	0.76	0.447	0.307	0.997	0.737	1.567	0.681	1
1,2-Dihydroxy-8-carboxynaphthalene	0.943	1.099	1.281	1.082	1.146	1.091	0.692	0.897	1.342	0.797	0.927	1.193	1.273	1.174	0.895	0.793
1H-Indole-3-methanamine	1.019	1.732	0.994	1.472	1.404	1.045	1	1.156	1.203	0.889	1.286	1.423	1.485	1.065	1.12	1.226
1-Methylguanosine	1.617	1.093	0.611	1.327	1.263	0.661	0.91	1.471	0.899	0.852	0.586	0.62	2.268	2.973	1.145	1.091
2-(Methylamino)benzoic acid	0.706	1.143	1.329	0.942	1.462	0.734	0.673	0.711	1.773	1.301	0.459	1.936	0.538	0.619	0.86	1.083
2,3,4-Trihydroxbenzoic acid	1.074	1.257	1.113	1.328	1.152	1.321	1.18	1.016	1.213	1.14	1.201	1.424	1.102	1.015	1.133	1.282
2,3-Dihydroxy-p-cumic acid	1.446	1.451	1.388	1.582	1.648	1.363	1.826	1.435	1.498	1.846	1.763	1.712	1.794	1.514	1.61	1.488
2,4-Dihydroxy-6-pentylbenzoic acid	1.929	2.25	1.868	2.599	2.098	1.872	1.96	2.208	2.606	2.387	2.036	1.639	2.295	2.813	2.488	4.051
2,4-Dihydroxyhept-2-enedioic acid	0.849	1.122	0.973	0.962	1.222	0.858	1.092	0.938	1.075	1.06	1.037	1.139	1.12	1.03	1.17	1.14
2,5-Dihydroxybenzoate 2-O-glucuronide	1.573	0.813	0.949	0.847	1.074	1.693	0.71	0.898	0.612	1.179	0.854	1.481	0.552	0.715	1.14	0.714
2,5-Dihydroxybenzoate 2-O-sulfate	1.354	0.903	1.07	1.26	0.823	1.231	0.865	0.782	0.599	1.112	0.909	0.79	1.186	1.162	1.096	0.951
2,5-Dimethoxy-4-(2-propenyl)phenol	1.12	0.912	1.613	2.075	1.287	1.469	1.096	1.775	1.232	1.208	1.183	0.691	1.184	1.215	1.074	1.137
2,6-Dimethoxy-4-methylphenol	0.928	1.219	0.896	1.081	0.901	0.883	0.807	1.018	0.865	0.812	1.317	0.846	1.143	0.941	1.413	1.02
2,8-Dihydroxyadenine	0.886	1.058	0.976	0.919	1.009	0.814	0.741	0.883	1.106	1.022	1.143	1.005	1.009	0.939	1.157	1.145
2,8-Dihydroxyquinoline-beta-D-glucuronide	1.399	1.051	0.519	0.91	0.874	0.92	1.098	1.217	0.823	1.487	0.899	1.152	0.951	0.941	0.86	1.197
2-[(2-Aminoethylcarbamoyl)methyl]-2-hydroxybutanedioic acid	1.044	1.012	0.806	0.756	0.819	0.97	0.765	0.822	0.841	0.939	0.847	1.324	0.797	1.241	1.065	1.212
2-Amino-2-methyl-1,3-propanediol	1.084	1.18	1.264	1.152	1.011	1.018	1.115	1.065	0.891	0.998	1.115	0.898	1.13	1.236	1.191	0.953
2-Aminoethylphosphonate	1.183	1.468	1.385	1.499	2.306	1.866	1.563	1.207	1.144	1.237	1.062	2.152	1.405	1.103	1.067	1.102
2-Deoxy-scyllo-inosamine	1.092	0.93	0.809	0.814	0.891	0.811	1.264	1.271	0.925	1.479	0.859	1.111	1.018	0.519	1.023	0.829
2-Descarboxy-cyclo-dopa	0.995	0.988	0.87	0.98	0.84	0.792	1.126	1.337	0.961	0.892	0.992	0.91	0.802	1.005	0.917	0.829
2-Hydroxy-3-(4-hydroxyphenyl)propenoate O-glucuronide	0.976	0.514	0.794	0.718	0.658	0.882	0.444	0.79	0.76	0.724	0.656	1.113	0.786	0.559	0.63	0.853
2-Hydroxy-3-(4-hydroxyphenyl)propenoic acid	1.1	0.785	0.74	1.052	0.64	1.07	0.734	0.815	0.846	1.16	0.883	0.898	1.335	0.774	1.015	0.938
2-Hydroxy-3-methylbenzalpyruvic acid	1	1.021	1.14	1.232	0.771	0.906	1.098	0.704	1.106	1.012	0.959	1.22	1.047	0.929	0.795	0.861
2-Hydroxy-4-imino-2,5-cyclohexadienone	1.073	0.893	0.968	0.995	1.045	1.057	1.131	0.98	1.141	1.133	0.956	1.104	1.062	1.152	1.193	1.114
2-Hydroxy-4-methylbenzaldehyde	1.427	1.21	1.155	1.261	0.99	1.378	1.027	1.329	1.014	0.853	1.28	1.164	1.136	1.047	1.005	0.913
2-Hydroxy-cis-hex-2,4-dienoic acid	0.983	1.101	0.896	1.087	0.964	0.946	1.093	0.96	1.073	1.024	0.82	0.887	1.028	0.846	0.945	0.904
2-Hydroxyethylenedicarboxylic acid	0.859	1.156	0.623	1.116	0.943	0.743	0.734	0.849	0.954	1.138	0.755	1.019	1.063	0.829	0.761	1.037
2-Methyl-3-hydroxy-5-formylpyridine-4-carboxylic acid	1.182	0.754	0.774	0.864	1.037	0.734	1.142	0.901	0.91	1.126	0.908	1.209	0.856	0.78	0.915	0.788
2-Pyrrolidineacetic acid	1.062	0.714	0.729	0.816	1.51	0.814	1.083	0.889	1.05	1.033	0.896	1.025	0.922	0.898	0.759	0.851
3-(3,4-Dihydroxyphenyl)-2-methylpropionic acid	1.1	1.068	1.167	1.145	1.159	1.152	1.166	0.959	1.397	1.113	0.952	1.431	1.142	0.832	0.851	0.993
3-(3,4-Dihydroxyphenyl)lactic acid	1.124	0.906	0.858	1.014	0.85	1.097	0.977	0.687	0.67	1.288	1.17	1.028	1.042	0.792	1.036	1.201
3-(3,4-Dihydroxyphenyl)pyruvic acid	2.477	0.787	0.799	0.917	0.777	0.998	0.824	0.628	1.036	1.001	0.615	0.907	1.123	0.909	0.744	0.979
3-(3,5-Dihydroxyphenyl)-2-propenoic acid	1.172	1.286	1.31	1.405	1.258	1.457	1.147	1.58	1.101	1.139	1.478	1.106	1.321	1.181	1.105	1.304
3-(3-Hydroxyphenyl)-3-hydroxypropanoic acid	1.113	0.871	0.923	0.883	0.968	1.298	1.051	0.743	1.202	0.996	1.569	0.98	1.42	0.901	0.94	1.118
3-(4-Hydroxyphenyl)pyruvic acid	1.297	1.057	1.297	1.431	1.268	1.726	1.433	1.632	1.171	1.207	1.712	1.065	1.36	1.296	1.098	1.199
3',4'-Dihydroxyacetophenone	1.094	2.178	0.859	1.7565	1.4601	1.762	1.131	1.417	2.438	0.913	0.756	0.819	0.888	1.064	0.811	0.9476
3,4-Dihydroxy-L-phenylalanine	1.007	1.05	0.972	0.91	1.175	0.857	0.948	0.942	1.007	1.215	1.046	1.092	1.004	0.986	1.177	1.013
3,4-Dihydroxymandelaldehyde	0.847	1.285	1.135	1.674	0.929	0.805	1.157	0.86	0.846	0.729	1.51	0.938	1.196	0.638	1.07	0.674
3,4-Dihydroxymandelic acid	0.916	1.12	1.015	1.108	0.864	1.016	0.844	0.718	1.113	0.912	0.811	1.196	0.91	0.957	0.786	0.984
3,4-Dihydroxyphenylethyleneglycol	1.511	0.853	0.833	1.073	1.046	1.222	1.088	0.762	1.152	1.318	0.977	1.015	1.517	1.534	0.855	1.142
3,4-Dihydroxyphenylpropanoic acid	1.261	0.837	0.896	0.993	0.793	1.052	1.133	0.784	0.735	1.336	1.096	1.014	1.338	0.747	0.926	0.983
3,4-Dihydroxyphenylvaleric acid	1.034	1.167	1.134	1.088	1.304	0.717	1.212	0.99	0.854	1.203	1.16	1.331	1.232	0.908	0.94	1.104
3,4-Dihydroxystyrene	1.045	1.111	1.181	1.127	0.858	0.928	1.073	1.051	1.004	0.829	1.065	1.087	1.045	1.015	0.995	0.933
3,4-Dimethoxyphenylethylamine	1.219	0.921	1.103	0.834	1.117	1.083	0.869	1.105	0.706	1.201	0.929	1.184	0.799	0.908	1.23	0.995
3',5'-Dihydroxyacetophenone	1.06	0.782	0.939	1.22	0.788	1.157	0.701	0.689	0.89	1.505	0.96	0.873	1.341	0.656	1.294	1.067
3-Amino-2-piperidone	1.066	0.901	1.027	1.121	0.932	1.087	1.079	1.386	1.135	0.987	1.144	0.976	1.056	1.125	1.012	0.932
3-Amino-4-hydroxybenzoic acid	0.82	1.063	1	1.293	1.106	1.158	0.859	0.587	1.001	0.956	0.929	1.027	1.154	0.761	1.095	2.096
3-Cyano-L-alanine	0.965	1.143	1.155	1.039	0.933	1.06	1.026	1.182	1.254	1.039	1.053	1.084	0.982	0.811	0.863	0.772
3-Dechloroethylifosfamide - 2 tags / Dechloroethyl cyclophosphamide	0.928	1.46	0.845	0.98	1.086	1.15	0.919	0.854	1.03	0.966	1.003	1.1	0.847	1.261	1.081	1.224
3-Formyl-6-hydroxyindole	1.042	1.235	0.901	0.86	0.969	0.683	0.911	0.878	1.058	0.593	1.178	0.813	0.857	0.794	0.823	1.135
3-Hydroxyanthranilic acid	0.719	0.985	0.996	1.35	1.075	1.143	0.824	0.612	0.762	0.878	0.946	0.865	1.245	0.76	0.978	2.09
3''-Hydroxy-geranylhydroquinone	0.813	0.778	0.844	1.342	1.083	0.761	0.741	0.879	1.198	0.753	0.891	0.862	0.682	0.906	0.948	0.937
3-Hydroxyhippuric acid	1.171	0.763	0.946	1.126	0.857	1.201	1.052	1.148	0.97	0.999	1.249	0.901	1.089	0.844	1.259	0.927
3'-Methoxyfukiic acid	1.057	1.194	0.84	0.962	0.665	0.707	1.256	1.398	0.758	1.138	1.014	1.186	1.199	0.982	0.908	0.85
3-Methylcytosine	0.885	0.549	0.648	0.904	0.795	0.661	0.937	0.955	0.594	0.927	0.741	0.739	0.797	0.897	0.693	0.951
3-Phenylpropionylglycine	0.905	0.732	1.014	0.944	1.099	1.048	1.039	1.039	0.818	1.183	1.026	0.977	1.08	1.134	1.051	1.315
3-Sulfino-L-alanine	1.108	0.974	0.99	1.158	1.097	1.072	1.079	0.971	0.675	1.249	0.849	0.871	0.929	1.329	0.928	1.049
3-Sulfocatechol	1.383	0.893	0.948	0.94	0.824	0.758	1.293	1.003	0.904	0.92	0.799	0.944	1.323	0.911	0.918	0.801
4,6-Dihydroxyquinoline	1.141	0.853	0.984	1.121	0.775	0.667	0.979	0.94	0.68	0.891	0.965	0.954	0.903	0.704	0.972	0.829
4-Amino-2-methylenebutanoic acid	1.078	0.952	0.87	0.75	0.96	0.855	0.932	1.019	1.131	1.001	1.124	0.904	0.752	0.846	1.307	0.886
4-Aminobutyraldehyde	1.044	1.262	1.227	1.094	1.013	1.096	1.097	1.067	0.857	0.963	1.093	0.924	1.098	1.221	1.118	0.882
4-Caffeoyl-1,5-quinolactone	1.151	1.1	0.818	1.628	1.506	1.086	0.858	1.355	0.953	0.87	1.385	0.906	1.239	1.11	0.912	0.961
isomer 2 of 4-Chloro-L-lysine	0.895	1.014	0.891	0.95	1	1.07	0.858	0.915	0.982	1.016	0.933	0.953	0.931	1.106	1.014	1.41
4-Guanidinobutanal	1.037	1.02	1.008	1.136	1.116	0.978	1.06	1.102	0.897	0.828	1.101	0.892	1.064	0.867	0.902	0.815
4-Hydroxy-2,6,6-trimethyl-3-oxo-1,4-cyclohexadiene-1-carboxaldehyde	0.86	1.128	0.873	1.105	0.973	0.855	1.024	0.958	1.207	0.789	0.838	1.034	1.084	0.962	1.043	1.142
4-Hydroxy-4-methylglutamic acid	1.192	1.244	1.074	1.123	1.184	0.938	1.032	1.069	0.964	1.267	1.112	1.027	1.293	0.972	1.256	1.415
4-Hydroxybenzyl alcohol	1.136	0.871	0.968	0.949	0.699	0.607	1.125	1.202	0.962	0.919	0.971	1.015	0.881	1.05	0.914	0.773
4-Hydroxybenzylamine	0.946	1.316	0.997	1.549	1.354	1.175	1.09	1.406	0.872	1.042	1.473	0.821	1.362	1.203	0.908	0.921
4-Hydroxy-L-tryptophan	1.193	1.135	1.029	1.064	0.823	1.135	0.857	1.067	1.048	0.986	0.976	1.125	1.089	0.992	1.045	1.027
4-Hydroxyphenylglyoxylic acid	0.925	1.05	1.029	1.001	0.834	1.078	0.834	0.77	0.998	0.875	0.823	1.201	0.897	0.934	0.695	0.953
4-Hydroxyphthalide	0.857	1.306	1.127	1.672	0.962	0.893	1.121	0.889	0.84	0.79	1.436	0.995	1.128	0.624	1.03	0.693
4-Hydroxypiperidine	0.941	0.967	1.042	1.342	1.068	1.064	0.998	1.279	0.856	0.771	1.409	0.817	1.203	1.163	0.962	0.79
4-Hydroxystyrene	0.946	1.035	1.02	1.098	1.01	0.961	1.001	0.992	1.128	0.823	1.015	1.059	0.997	0.928	1	0.94
4'-N-desmethylolanzapine	1.118	0.952	1.193	1.054	1.077	0.692	1.138	0.872	1.263	0.877	0.775	1.461	1.021	0.863	0.827	0.989
4-Sulfocatechol	0.981	1.285	0.833	0.922	0.903	0.703	0.934	0.817	0.897	0.872	0.993	0.938	0.809	0.897	1.015	0.773
5-(2-Furanyl)-1,2,3,4,5,6-hexahydro-7H-cyclopenta[b]pyridin-7-one	1.196	0.93	1.059	0.864	1.063	0.992	0.923	0.985	0.748	1.316	0.899	1.063	0.794	0.939	1.147	1.045
5-(3',4'-Dihydroxyphenyl)-gamma-valerolactone	1.24	1.218	1.067	0.966	0.89	0.534	1.418	1.13	1.004	0.714	1.108	1.085	0.831	0.709	1.118	0.647
5-Amino-2-oxopentanoic acid	1.108	1.08	0.985	1.061	0.995	1.045	0.979	0.915	0.967	1.047	0.928	1.219	0.859	1.077	0.97	0.982
5-Amino-6-(5'-phospho-D-ribitylamino)uracil	1.139	1.086	1.219	0.795	1.375	0.9	0.875	1.255	1.337	0.837	1.205	0.886	0.828	1.122	0.607	0.949
5-Aminopentanal	0.963	0.942	1.07	1.341	1.041	1.026	1.023	1.306	0.89	0.817	1.367	0.792	1.216	1.203	0.981	0.818
5-Carboxyvanillic acid	0.946	0.697	0.956	0.982	0.804	1.118	1.487	1.008	0.94	0.875	0.964	0.646	0.774	1.267	0.981	1.462
5-Deoxyleucopelargonidin	0.856	0.749	0.791	0.792	0.951	0.706	0.917	0.893	0.665	1.113	0.402	0.629	0.874	1.058	0.571	0.84
5-Ethyl-1,2,3,4,5,6-hexahydro-7H-cyclopenta[b]pyridin-7-one	0.978	1.044	0.885	1.164	0.901	0.849	0.874	0.933	0.87	1.049	0.9	1.008	1.025	0.989	0.936	0.973
5-Guanidino-2-oxopentanoic acid	1.134	1.218	1.125	1.109	1.209	1.074	1.055	1.054	1.046	0.998	1.313	1.103	1.254	1.087	1.087	1.096
5-Hydroxyconiferaldehyde	0.864	0.932	0.893	1.498	1.092	0.603	1.154	0.828	0.781	0.996	0.829	1.044	1.17	0.687	0.932	0.915
5-Hydroxyferulic acid methyl ester	1.227	0.776	0.789	0.648	0.631	1.386	0.829	0.976	1.067	1.16	0.659	0.818	0.781	2.095	0.899	1.044
5-Hydroxyindoleacetic acid	0.995	0.938	0.854	1.21	0.799	0.592	0.977	0.898	0.628	0.884	1.05	0.775	0.938	0.682	1.044	0.8
5-Hydroxykynurenine	1.331	0.732	1.032	1.116	0.616	0.663	0.627	0.824	0.661	1	0.827	1.944	1.111	0.903	0.731	0.816
5-Phosphooxy-L-lysine	0.897	1.924	1.011	1.233	1.071	1.159	0.901	0.953	1.598	1.062	0.873	0.79	0.994	0.91	1.332	1.039
6-Amino-2-oxohexanoic acid	0.92	1.011	0.929	0.998	1.026	0.852	0.872	1.079	0.953	1.035	0.963	1.017	0.88	0.821	0.966	0.948
2-aminohexanedioic acid	1.459	1.199	1.455	1.491	1.487	1.19	1.447	1.411	1.041	1.027	1.253	1.154	1.327	1.181	1.155	1.105
7,8-Diaminononanoic acid	1.078	1.26	1.27	1.154	1.121	1.579	1.165	1.199	1.234	1.127	0.933	1.096	1.202	1.133	1.483	1.108
7-Carboxy-7-carbaguanine	0.874	0.986	0.809	1.064	1.123	0.978	0.724	0.929	0.744	0.974	0.864	0.815	1.031	1.072	1.057	1.355
7-Cyano-7-carbaguanine	0.828	0.93	1.035	0.898	0.909	1.008	1.077	0.875	1.275	0.937	0.943	0.649	0.743	0.95	1.05	0.78
8-C-Glucosylnaringenin	1.069	0.241	1.559	0.939	1.035	0.531	0.575	0.874	1.264	0.664	1.43	0.818	1.297	0.787	1.285	1.038
9-Azabicyclo[3.3.1]nonan-3-one	1.446	0.894	1.092	0.975	1.164	1.08	0.915	1.249	0.93	1.308	1.007	1.124	0.841	0.898	1.221	1.181
Acetylhydrazine	1.065	1.046	1.043	1.255	1.272	1.092	1.082	1.057	1.539	1.082	2.124	1.033	1.175	1.049	1.309	1.049
alpha-CEHC	1.038	1.132	1.173	1.1	1.166	1.211	1.018	0.733	0.867	1.23	0.669	1.15	1.146	0.867	0.893	0.807
alpha-Cyano-4-hydroxycinnamic acid	1.068	0.883	1.043	0.932	0.88	1.118	0.773	0.709	0.887	0.944	0.728	1.226	0.821	1.022	0.758	1.143
Aminoacrylic acid	1.227	1.039	0.8	1.171	0.936	0.662	1.052	1.26	0.831	0.995	0.812	0.946	1.072	0.915	0.839	0.78
Aminoethoxyacetic acid	1.072	1.098	1.137	1.172	1.077	1.172	1.103	1.254	1.139	0.975	1.191	0.727	1.068	1.099	1.038	0.998
Amphetamine	1.005	1.063	0.911	1.088	0.9	0.994	0.963	0.91	0.81	0.939	0.925	0.89	0.853	0.984	0.875	1.007
Arginyl-Cysteine	0.522	0.559	0.588	0.521	0.564	0.646	0.525	0.636	0.729	0.632	0.573	0.663	0.528	0.623	0.631	0.707
Ascorbic acid	0.96	1.147	1.318	1.136	1.326	0.805	0.938	1.013	1.191	1.054	0.908	1.464	0.9	0.906	1.078	0.898
Asparaginyl-Alanine	0.638	0.996	1.125	0.726	0.91	0.68	0.763	0.792	1.006	1.087	1.053	0.882	0.982	0.914	1.298	0.896
Asparaginyl-Hydroxyproline	1.143	1.008	1.137	1.091	1.35	0.924	0.954	0.972	1.028	1.042	0.973	1.116	0.978	1	1.021	1.028
Asparaginyl-Methionine	0.995	0.968	1.107	1.197	1.133	1.143	1.173	1.24	1.078	1.03	1.42	1.137	0.925	0.838	1.158	0.834
Avenanthramide 1p	1.347	0.662	1.241	1.164	0.7	0.893	1.257	1.134	0.966	0.899	1.115	1.175	1.201	0.731	0.781	0.741
Avenic acid A	1.013	0.962	1.122	1.305	0.861	1.021	1.13	1.092	0.866	0.793	1.205	0.829	1.148	0.746	0.917	0.746
Baeocystin	1.307	0.713	0.661	0.734	0.739	0.879	1.086	1.491	0.837	1.656	0.975	1.212	0.943	0.875	0.996	0.711
Benzyl salicylic acid	0.881	1.049	0.936	0.932	1.167	0.851	1.026	1.071	1.177	1.205	1.348	0.925	1.168	1.09	1.284	1.151
beta-Alanyl-L-lysine	0.833	0.739	0.964	1.128	0.838	1.224	1.076	1.144	1.025	1.095	1.076	0.713	1.63	1.298	0.84	1.081
Beta-Guanidinopropionic acid	0.677	0.718	0.807	0.771	0.848	0.743	0.88	0.787	0.894	1.08	0.988	1.124	0.858	0.692	1.058	0.932
Butylparaben	1.187	0.998	1.156	1.315	0.869	1.007	1.305	1.058	1.219	0.973	0.76	1.191	1.009	0.674	0.786	0.878
Caffeic acid 4-sulfate	1.245	0.616	0.773	0.975	0.708	1.343	1	0.683	0.596	1.003	0.826	1.004	1.059	0.729	1.02	0.954
Caffeic aldehyde	1.082	1.002	1.227	0.654	1.063	0.955	0.958	0.803	1.549	0.997	0.805	1.448	0.963	1.048	1.105	1.361
Calystegin A3	1.21	0.956	1.218	1.036	1.243	1.097	1.059	1.055	1.137	1.217	0.909	0.941	1.155	1.062	1.134	1.041
Calystegine A6	1.179	0.865	1.074	1.026	1.112	1.081	1.376	1.118	0.981	1.121	0.988	0.975	1.068	1.15	1.052	1.038
Carnosine	0.875	0.772	0.903	0.842	0.876	1.236	1.064	0.881	0.817	0.911	0.899	0.806	0.907	1.735	0.756	1.545
cis,cis-2,4-Dihydroxy-5-methyl-6-oxo-2,4-hexadienoic acid	1.097	1.064	1.159	0.998	1.197	1.904	0.978	0.95	1.436	1.307	0.779	1.05	0.816	1.461	1.017	1.638
Coniferyl acetic acid	1.069	0.976	1.035	1.355	0.828	0.884	1.206	1.019	0.817	0.828	1.196	0.851	1.056	0.743	1.022	0.774
Coniferyl alcohol	1.263	1.151	0.891	1.527	0.816	1.373	1.441	1.39	1.388	0.955	0.72	1.29	1.096	1.08	0.99	1.073
Creatinine	0.973	0.799	0.873	0.821	1.062	0.961	0.973	1.055	1.079	1.188	0.985	1.228	0.875	1.057	1.096	1.16
Cyanamide	1.523	1.192	1.378	1.286	1.658	1.138	1.226	1.457	1.169	1.059	1.306	1.493	1.53	1.343	1.068	1.236
cyclic 6-Hydroxymelatonin	1.234	1.005	1.006	0.905	0.897	1.098	0.944	1.385	1.187	1.021	1.105	1.284	0.899	0.985	1.195	1.02
Cyclohexylsulfamic acid	1.183	1.045	0.712	0.622	1.009	0.537	1.266	1.187	0.885	0.903	1.191	0.891	0.769	0.825	0.925	1.143
Cystathionine sulfoxide	1.296	1.333	1.331	1.647	1.222	1.198	1.632	1.399	0.96	1.642	1.087	0.964	1.071	1.294	1.134	1.071
Cysteinyl-Proline	0.97	0.98	1.013	0.995	0.948	0.88	0.907	1.29	0.835	0.93	1.123	0.849	1.1	0.917	0.921	0.891
Daidzein	0.821	0.99	1.226	1.053	0.75	0.819	1.057	1.198	0.765	0.86	1.171	0.917	0.784	0.814	0.84	0.756
Dehydroalanine	0.91	1.215	0.866	0.947	0.959	0.907	0.876	1.2	1.592	0.997	0.912	1.362	0.934	0.811	1.122	0.88
Deisopropylatrazine	1.154	0.883	1.404	0.806	0.953	1.167	0.926	0.817	1.118	1.093	1.256	1.094	1.042	0.955	0.887	1.067
Deoxycytidine	1.222	0.878	1.1	0.916	1.302	1.02	1.156	1.281	1.007	1.46	1.104	1.185	1.101	1.853	1.261	1.104
Deoxyeritadenine	0.868	1.095	0.899	0.95	0.829	1.101	0.899	0.775	1.216	0.979	0.72	0.875	0.739	1.162	1.067	1.047
desethylzaleplon	1.116	0.812	0.657	0.606	0.775	0.514	1.37	1.011	1.52	0.641	1.313	0.958	0.968	1.51	1.464	0.823
Diethanolamine	1.342	1.16	1.025	0.98	0.818	0.875	0.811	0.717	0.894	1.024	0.869	0.917	0.816	0.755	0.977	1.016
Dihydrocaffeic acid 3-O-glucuronide	1.296	0.793	0.881	0.795	0.938	1.378	0.979	0.895	0.651	1.396	0.996	1.801	0.592	0.712	1.079	0.993
Dihydrocaffeic acid 3-sulfate	1.205	0.818	1.01	1.205	0.886	1.16	1.151	0.823	0.637	1.085	1.055	0.924	1.178	0.762	1.112	0.805
Dihydropteroic acid	1.069	1.064	0.737	0.9	1.974	1.189	1.682	1.174	1.118	1.169	1.98	0.754	1.208	0.973	1.625	1.527
Dimethyl fukiic acid	1.156	1.147	0.632	1.114	0.891	1.025	1.298	1.403	0.695	2.226	0.83	1.476	1.225	1.093	0.975	1.117
DL-Ornithino-L-alanine	1.092	1.097	1.182	0.965	1.25	0.979	1.132	1.067	1.086	0.944	1.027	1.303	1.052	0.938	1.007	1.123
D-Lysopine	0.958	0.882	0.951	0.828	1.163	1.069	0.961	0.948	0.92	1.132	0.785	0.852	0.987	0.894	1.051	1.08
Dopamine quinone	1.023	1.404	1.033	1.255	1.076	0.871	1.089	0.803	1.121	1.168	1.005	1.006	1.464	0.999	0.826	1.088
Epsilon-(gamma-Glutamyl)-lysine	0.998	0.964	1.24	1.114	1.173	0.817	0.904	1.147	0.911	0.702	1.24	0.835	1.026	1.232	1.051	0.834
Ethyl vanillin	1.058	1	1.112	1.302	1.117	1.225	0.911	0.847	1.069	1.21	1.159	1.606	1.135	0.693	0.765	0.944
Formyl-5-hydroxykynurenamine	1.198	0.863	1.055	1.237	0.847	0.877	0.92	0.855	0.949	0.727	1.215	1.168	1.038	0.937	0.937	0.963
gamma-Amino-gamma-cyanobutanoic acid	1.042	1.039	1.145	1.027	1.046	1.096	1.026	1.18	1.019	1.087	1.056	1.253	0.954	0.876	0.827	0.915
gamma-Carboxyglutamic acid	1.399	0.963	0.913	1.137	1.136	0.946	1.003	1.051	1.05	1.116	0.969	1.165	1.133	0.942	1.157	0.972
gamma-CEHC	1.293	0.741	0.841	0.883	1.28	0.985	1.347	0.813	0.864	1.23	0.778	1.685	0.901	0.928	0.723	0.769
gamma-Glutamylarginine	0.99	1.18	1.276	1.059	1.288	0.862	0.829	1.245	0.922	0.842	1.383	1.008	1.082	1.095	1.03	0.964
gamma-Glutamyl-beta-cyanoalanine	0.959	0.964	0.881	0.932	1.034	0.847	1.082	0.864	1.091	0.941	0.799	1.194	0.931	0.999	1.154	0.897
gamma-Glutamyl-gamma-aminobutyraldehyde	1.115	1.247	0.989	1.22	1.219	0.884	1.086	0.877	1.008	1.133	0.975	1.021	0.995	1.122	0.995	1.005
gamma-Glutamylglycine	0.957	1.182	1.349	0.953	1.174	0.842	0.823	1.007	1.571	1.011	0.897	1	0.774	1.013	1.231	0.894
gamma-Glutamylproline	1.02	1.17	0.992	0.942	0.997	1.095	1.09	1.134	1.096	1.416	1.009	1.086	0.807	1.165	1.121	1.378
gamma-Glutamyltryptophan	1.171	0.816	1.087	0.989	1.02	0.893	0.941	1.07	0.914	0.922	1.024	1.1	0.971	1.094	0.859	1.063
gamma-Glutamyltyrosine	1.095	1.126	1.381	0.995	1.008	0.83	1.081	1.092	0.989	0.775	1.096	1.128	0.891	1.109	0.982	0.908
Gentisate aldehyde	0.723	0.861	0.859	1.097	0.858	0.668	0.818	0.977	0.682	0.869	0.772	0.823	0.924	0.894	0.734	1.086
Glutaminylhydroxyproline	0.77	0.754	1.101	0.666	0.917	1.539	0.963	0.864	1.263	1.278	0.874	1.122	0.799	1.023	1.186	2.18
Glutaminylmethionine	1.152	1.018	1.078	1.33	0.917	0.896	1.115	1.265	0.818	0.738	1.249	0.986	0.989	0.758	0.813	0.625
Glutamyl-Gamma-glutamic acid	0.823	0.659	0.92	1.187	1.154	0.685	1.063	0.783	0.978	0.735	0.821	0.8	0.728	0.753	0.738	1.213
Glycyl-glycine	1.178	1.321	1.277	1.355	1.227	1.319	1.248	1.377	1.337	1.246	1.145	1.366	1.218	1.102	1.094	1.051
Glycylprolylhydroxyproline	0.989	0.958	1.129	0.988	1.208	0.877	1.138	0.915	0.977	0.943	0.958	0.882	0.828	0.997	1.072	1.03
Histamine	0.892	1.067	1.055	0.845	0.88	0.716	0.896	0.888	1.1	1.101	1.012	1.074	0.963	1.079	1.308	1.001
Histidinyl-Alanine	0.837	0.592	1.008	0.915	1.106	0.732	1.084	1.148	0.995	1.072	0.867	0.906	0.945	1.25	0.935	1.311
Histidinyl-Glycine	0.999	1.018	1.115	1.006	1.083	1.22	0.926	1.072	1.109	0.9	0.884	0.754	1.175	1.244	0.878	1.148
Homogentisic acid 2-O-sulfate	0.847	0.586	1.026	1.225	0.675	0.631	0.716	0.821	0.866	0.826	0.523	1.257	0.742	1.423	0.805	2.671
Hydroxyethyl glycine	1.046	1.007	1.132	1.043	1.179	1.034	1.024	1.068	1.282	0.988	1.096	0.924	0.976	0.972	1.047	1.101
Hydroxyl frovatriptan	1.24	0.969	0.869	0.982	1.094	0.847	0.803	1.356	0.716	1.181	1.048	1.027	1.064	0.879	0.921	0.897
Hydroxylated lecithin	1.193	1.1	0.985	1.059	1.166	0.826	0.886	1.034	0.89	1.133	1.044	1.191	1.093	0.978	1.159	0.962
Hydroxyprolyl-Cysteine	1.524	1.116	1.194	1.148	1.011	1.048	1.573	1.396	1.013	0.882	1.324	0.863	1.039	1.053	1.081	1.012
Hydroxyprolyl-Gamma-glutamic acid	0.989	0.93	1.117	0.991	1.216	0.869	1.087	0.831	0.889	0.873	0.965	0.839	0.691	0.996	0.978	0.982
Hydroxyprolyl-Histidine	0.682	0.701	0.455	0.622	0.719	0.657	0.267	0.556	0.717	0.572	0.622	0.861	0.806	1.046	0.676	0.637
Hydroxyprolyl-Proline	1.052	0.98	1.003	0.981	1.238	0.782	1.062	1.009	1.247	1.07	0.683	1.129	0.779	0.982	0.981	0.987
Hydroxyprolyl-Valine	1.074	0.954	0.862	1	1.105	0.75	1.189	1.174	0.773	1.139	1.101	0.896	0.901	1.421	1.136	1.112
Hypotaurine	0.826	0.697	0.87	0.76	1.005	2.2	0.576	0.67	0.555	1.399	0.692	0.486	0.638	1.193	0.652	0.729
Isoleucyl-Hydroxyproline	0.798	1.23	0.774	0.856	1.116	0.635	1.428	1.107	1.485	1.068	0.421	0.873	0.816	1.293	0.977	1.184
Isomer 1 of (2R,3R,4R)-2-Amino-4-hydroxy-3-methylpentanoic acid	1.096	0.963	1.128	0.949	0.761	1.079	1.137	1.072	1.323	1.247	0.866	0.875	1.09	0.975	0.969	0.791
Isomer 1 of 1-Methylguanosine	0.898	0.937	0.887	1.022	0.908	0.836	0.301	0.848	1.003	1.007	0.891	1.112	0.998	0.91	1.091	0.959
Isomer 1 of 2,5-Dihydroxybenzoic acid	1.44	0.837	1.037	1.217	0.748	1.406	0.857	0.882	0.501	1.195	1.005	0.812	1.117	0.92	1.228	1.136
Isomer 1 of 2,6-Dimethoxy-4-methylphenol	1.012	1.763	1.493	1.581	1.479	1.552	1.23	1.406	1.197	1.225	1.2	1.151	1.656	1.319	1.49	1.494
Isomer 1 of 2-Amino-2-methyl-1,3-propanediol	1.421	1.685	1.317	1.305	1.305	1.407	1.306	1.359	1.163	1.272	1.362	1.278	1.309	1.572	1.641	1.236
Isomer 1 of 2-Aminooctanoic acid	1.166	1.592	1.109	1.459	1.171	1.348	1.979	1.193	1.142	1.355	0.967	1.011	1.293	1.571	1.122	1.525
Isomer 1 of 2-Deoxy-scyllo-inosamine	0.974	0.903	0.806	0.953	1.199	0.76	1.296	0.983	1.092	1.152	1.065	0.953	0.956	0.876	1.143	1.038
Isomer 1 of 3,4-Dihydroxyphenylvaleric acid	1.31	1.107	1.048	1.222	1.059	0.817	1.184	1.185	1.021	1.161	0.911	1.191	1.329	0.911	1.276	0.985
Isomer 1 of 3,4-Dihydroxystyrene	1.114	1.192	1.195	1.197	1.014	1.268	0.988	1.179	1.168	0.857	1.292	1.147	1.139	1.068	1.025	0.922
Isomer 1 of 3-Amino-2-piperidone	1.101	0.98	1.132	1.11	0.875	1.052	1.014	1.013	0.88	1.113	1.048	1.062	1.089	1.09	1.02	1.022
Isomer 1 of 3-Cyano-L-alanine	1.133	1.175	1.111	1.143	1.068	1.042	1.096	1.245	1.15	1.192	1.275	1.086	1.168	0.954	1.092	0.895
Isomer 1 of 3'-Methoxyfukiic acid	1.235	0.6	0.366	0.783	0.554	0.833	1.106	1.83	0.551	1.842	0.439	1.182	1.432	1.095	1.191	0.659
Isomer 1 of 3-Sulfocatechol	1.017	0.862	1.187	1.243	0.991	0.638	1.168	0.591	0.97	0.608	1.437	0.694	1.559	0.694	0.999	1.123
Isomer 1 of 4-Chloro-L-lysine	0.876	1.148	0.824	0.908	1.113	0.835	1.06	0.891	0.941	0.91	0.876	1.043	0.858	0.935	0.965	1.18
Isomer 1 of 4-Guanidinobutanoic acid	1.07	0.692	1.068	0.855	0.664	0.957	1.125	0.807	1.12	1.068	0.764	0.936	0.666	0.875	0.931	0.958
Isomer 1 of 4-Hydroxy-L-tryptophan	1.34	0.739	1.162	0.866	0.812	0.687	1.002	1.179	0.853	1.058	0.796	0.944	1.339	0.858	0.853	0.681
Isomer 1 of 4-Hydroxystyrene	0.826	0.988	0.91	0.994	0.954	0.869	1.002	0.952	1.131	0.856	1.037	0.882	0.968	0.86	1.007	0.873
Isomer 1 of 5-(3',4'-Dihydroxyphenyl)-gamma-valerolactone	1.17	0.789	0.876	1.05	0.928	0.805	1.125	0.85	0.897	0.966	1.057	0.983	1.33	0.763	0.915	0.9
Isomer 1 of 5-Aminopentanoic acid	1.092	1.086	1.084	1.158	1.113	1.067	1.09	1.011	0.969	1.116	0.981	0.959	1.043	0.956	1.028	0.975
Isomer 1 of 5-Hydroxyindoleacetic acid	1	0.769	0.873	0.97	0.688	1.177	0.72	0.79	1.237	0.875	0.717	0.887	0.752	1.09	0.987	0.958
Isomer 1 of 5-Hydroxykynurenine	1.037	0.987	1.006	0.923	1.013	1.042	0.913	0.891	1.021	1.041	0.876	1.114	1.018	1.042	0.933	1.356
Isomer 1 of 5-Hydroxylysine	1.217	1.294	1.359	0.97	1.246	1.141	1.165	1.246	0.881	1.221	1.008	1.073	1.088	1.091	1.088	1.026
Isomer 1 of Aminoacrylic acid	0.591	1.103	1	0.636	0.86	0.586	0.674	0.536	1.415	0.996	0.807	1.131	0.803	0.798	0.74	0.927
Isomer 1 of Aminoethoxyacetic acid	1.282	1.058	1.068	1.127	0.908	1.206	1.219	1.212	1.145	1.172	0.974	0.727	1.165	0.884	1.011	0.882
Isomer 1 of Ascorbic acid	0.842	1.101	0.809	0.542	1.474	0.996	0.622	1.184	1.045	0.819	0.622	1.181	0.731	1.403	1.474	1.151
Isomer 1 of Butylparaben	1.044	1.436	1.172	1.394	0.982	1.249	1.481	1.045	1.032	1.069	0.645	1.205	1.313	0.755	0.86	0.869
Isomer 1 of Calystegin A3	1.041	0.757	0.844	0.951	0.792	0.87	1.139	0.993	0.887	1.083	0.837	0.692	0.962	1.015	0.938	0.862
Isomer 1 of Calystegine A6	1.213	1.31	0.912	1.076	1.465	1.293	0.958	1.16	1.217	1.141	1.148	1.207	1.141	1.02	1.115	1.213
Isomer 1 of Epsilon-(gamma-Glutamyl)-lysine	0.796	1.247	0.83	0.921	1.016	0.971	1.178	0.938	1.301	1.089	0.871	0.909	0.975	0.744	1.105	1.09
Isomer 1 of gamma-Amino-gamma-cyanobutanoic acid	1.029	0.726	0.948	1.076	1.516	0.745	0.965	1.091	0.828	1.148	0.762	1.162	0.945	0.829	1.011	0.847
Isomer 1 of gamma-Glutamyl-beta-cyanoalanine	0.502	0.992	0.912	0.639	0.84	0.751	1.034	0.75	1.063	0.859	0.798	0.966	0.841	0.974	1.101	0.915
Isomer 1 of Glycyl-Proline	0.626	0.532	0.908	1.116	1.567	0.771	1.355	1.057	0.516	1.021	0.67	1.063	1.374	1.18	1.168	1.061
Isomer 1 of Histidine	1.084	1.014	1.157	0.864	0.878	0.853	1.122	1.008	1.018	1.113	0.932	0.821	0.971	1.087	1.122	0.948
Isomer 1 of Hydroxylated lecithin	1.339	1.557	1.278	1.333	1.407	1.554	1.187	1.334	1.488	1.505	1.227	1.362	1.592	1.312	1.14	1.144
Isomer 1 of Hydroxyprolyl-Gamma-glutamic acid	0.999	0.99	1.22	0.938	1.173	1.146	0.941	0.845	1.134	1.196	0.921	1.073	0.893	0.953	1.073	1.082
Isomer 1 of Isoleucyl-Alanine	1.107	1.018	0.872	0.926	0.995	0.932	0.967	1.091	0.98	1.204	1.007	1.034	1.007	0.939	1.114	1.082
Isomer 1 of L-2-Amino-3-methylenehexanoic acid	1.173	1.033	0.912	0.756	1.101	0.773	0.75	0.794	0.65	1.037	1.306	0.831	0.726	0.929	1.333	1.07
Isomer 1 of L-2-Amino-5-hydroxypentanoic acid	1.189	1.058	1.161	1.056	0.815	1.328	1.461	0.997	1.355	1.476	0.716	0.958	1.254	0.909	0.897	0.94
Isomer 1 of L-alpha-Aspartyl-L-hydroxyproline	1.143	1.136	0.839	1.039	1.147	0.721	1.18	1.016	1.163	1.183	0.815	1.21	1.06	0.883	0.973	1.211
Isomer 1 of L-Arginine / D-Arginine	0.986	1.042	0.991	0.936	0.97	0.975	0.787	1.15	0.954	0.894	1.134	1.095	1.098	0.916	0.99	0.895
Isomer 1 of L-Ornithine / D-Ornithine	1.202	1.547	1.42	0.88	0.84	1.508	1.095	1.125	0.897	1.245	0.886	0.849	1.332	1.922	1.245	1.465
Isomer 1 of Lysine	1.068	1.16	1.232	1.32	0.959	1.449	1.158	1.131	1.056	1.078	1.027	0.8	1.031	1.511	1.018	1.073
Isomer 1 of Mesalazine	1.043	0.584	0.866	1.027	0.733	0.645	0.735	0.684	1.349	1.147	0.834	1.627	0.844	0.855	1.071	1.005
Isomer 1 of Methionine	0.958	1.023	1.07	0.748	0.812	1.009	0.726	0.714	1.175	1.117	0.641	1.247	0.817	1.146	0.82	1.096
Isomer 1 of Methionine Sulfoxide	1.034	1.083	1.153	1.087	0.956	1.041	1.028	1.18	0.977	1.058	1.128	1.07	0.945	0.875	1.092	1.038
Isomer 1 of Methionyl-Serine	1.212	0.983	1.107	1.016	0.88	0.886	0.959	1.071	1.005	0.976	1.101	1.04	0.989	1.013	1.232	1.034
Isomer 1 of Morpholine	1.118	1.359	1.102	1.195	1.092	1.061	1.113	1.157	0.956	1.152	1.108	0.975	1.228	1.264	1.175	1.02
Isomer 1 of N(6)-Methyllysine	0.98	0.788	1.099	1.043	0.907	0.864	1.184	0.942	0.773	0.922	0.928	0.687	0.797	1.188	1.02	0.79
Isomer 1 of N-Acetyl-Dopamine	1.077	1.05	1.142	1.119	1.084	0.849	1.289	0.728	0.956	0.736	0.896	0.902	1.035	1.435	1.042	0.917
Isomer 1 of N-Acetylindoxyl	1.064	1.098	1.495	1.239	1.076	1.544	1.183	1	1.476	1.075	1.113	1.103	0.988	1.349	1.499	1.27
Isomer 1 of N-Carboxyethyl-g-aminobutyric acid	0.984	0.948	1.073	1.025	1.111	1.349	1.151	1.041	1.042	1.096	0.992	0.66	0.977	1.077	0.884	0.92
Isomer 1 of N-Formimino-L-glutamic acid	1.076	0.89	0.841	1.086	0.961	0.8	0.851	1.021	1.151	1.114	0.944	0.96	1.013	0.983	1.167	0.97
Isomer 1 of N-Methyl aspartic acid	1.026	1.11	0.908	0.831	0.967	1.383	0.961	1.042	1.196	1.112	0.98	1.073	1.138	1.232	1.116	1.124
Isomer 1 of O-Methyl-L-threonine	1.215	0.974	1.139	1.224	1.277	1.211	1.243	1.372	1.064	1.213	1.001	1.07	1.48	1.216	1.098	1.127
Isomer 1 of Phloroglucinol	0.795	1.242	1.029	0.977	0.723	0.882	0.97	1.013	1.154	0.808	0.971	1.114	1.084	0.64	1.08	1.21
Isomer 1 of Prolyl-Alanine	0.944	0.797	0.785	0.651	1.569	1.281	0.655	0.727	1.425	2.875	1.449	0.784	0.446	0.562	0.802	0.893
Isomer 1 of Prolyl-Glycine	0.888	1.082	1.217	1.109	1.312	0.813	1.24	1.169	1.232	0.907	1.057	1.145	1.24	0.953	0.84	0.932
Isomer 1 of Prolylhydroxyproline / Prolyl-Hydroxyproline	1.151	0.93	0.849	0.761	0.931	1.006	1.401	1.388	1.646	1.304	1.11	1.332	1.137	1.296	1.153	1.084
Isomer 1 of Serylproline	1.048	0.964	0.894	0.967	1.06	0.988	0.911	1.081	1.024	1.052	0.943	0.992	0.799	0.955	0.998	1.02
Isomer 1 of Valyl-Hydroxyproline	1.338	1.511	1.164	1.065	1.429	1.17	1.399	1.309	1.476	1.464	1.32	1.19	1.266	1.203	1.334	1.363
Isomer 1 of Valyl-Lysine	0.881	1.008	1.107	1.021	1.084	0.982	0.983	1.372	0.881	0.966	1.356	1.048	1.24	1.219	1.217	1.121
Isomer 2 of (2R,3R,4R)-2-Amino-4-hydroxy-3-methylpentanoic acid	1.09	0.982	1.013	1.015	0.9	1.063	1.268	1.077	1.12	1.193	0.949	0.935	1.114	0.924	0.888	0.92
4-Chloro-L-lysine	0.318	1.072	0.799	0.531	0.735	0.558	0.705	0.685	0.86	1.281	0.935	0.849	0.881	1.145	1.25	1.335
5-Aminopentanoic acid	1.147	1.063	1.115	1.211	1.165	1.047	1.081	0.971	0.921	1.048	0.972	0.881	0.974	0.99	1.035	1.027
Isomer 2 of 5-Hydroxyindoleacetic acid	1.248	0.832	0.929	1.095	0.822	0.966	1.148	1.003	1.047	0.972	0.971	1.114	0.942	0.913	1.029	0.997
Isomer 2 of 5-Hydroxykynurenine	1.247	0.85	1.033	0.977	0.856	0.863	0.999	0.719	0.891	1.043	0.843	0.862	0.993	1.1	0.972	1.058
Isomer 2 of Gamma-Aminobutyric acid	1.091	0.979	0.931	1.203	0.918	1.083	0.995	0.941	0.741	0.874	0.973	0.781	1.042	1.083	0.9	0.862
Isomer 2 of Histidine	1.009	0.695	1.065	1.163	1.122	0.992	1.134	1.251	0.956	1.255	0.981	0.897	1.105	1.279	0.978	1.172
Isomer 2 of Isoleucyl-Alanine	1.093	1.011	0.86	0.886	1.093	0.887	1.122	0.993	0.955	1.196	0.973	1.193	0.988	0.859	1.133	1.112
Isomer 2 of L-2-Amino-3-methylenehexanoic acid	1.299	1.169	1.039	0.917	1.205	1.102	0.766	0.976	0.701	1.159	1.148	0.977	0.824	1.012	1.208	1.155
Isomer 2 of L-alpha-Aspartyl-L-hydroxyproline	1.113	0.886	0.8	1.234	1.02	1.019	1.069	0.986	1.122	1.134	1.009	1.065	0.919	1.007	1.362	1.154
Isomer 2 of L-Ornithine - 2 tags / D-Ornithine	1.194	1.292	1.406	1.178	1.046	1.108	1.076	1.132	1.053	1.129	1.085	0.969	1.175	1.294	1.363	0.964
Methionine	0.835	0.884	0.98	0.956	0.913	0.997	0.961	0.908	0.81	0.815	0.836	0.802	0.834	0.789	0.815	0.884
Isomer 2 of N(6)-Methyllysine	0.99	0.981	1.14	1.086	0.991	0.993	1.163	1.055	0.891	1.158	0.999	0.993	0.814	1.208	1.11	0.869
Isomer 2 of Valyl-Hydroxyproline	1.254	1.257	1.099	1.604	1.35	1.074	1.162	1.196	1.173	1.551	0.944	1.297	1.193	1.125	1.82	1.264
Isomer 3 of (2R,3R,4R)-2-Amino-4-hydroxy-3-methylpentanoic acid	1.051	1.044	0.951	1.004	1.012	1.04	1.082	1.076	0.91	1.094	1.05	0.973	0.952	0.958	1.037	0.958
Isomer 3 of 4-Chloro-L-lysine	0.605	1.162	0.892	0.744	1.066	0.774	0.845	0.9	1.008	1.045	1.005	0.951	1.036	1.188	1.233	1.394
Isomer 3 of 5-Aminopentanoic acid	1.14	1.06	1.047	1.272	1.212	1.17	1.08	1.192	0.92	1.058	1.159	0.923	1.071	1.061	1.034	0.957
Isomer 3 of Histidine	1.007	1.025	1.026	1.003	0.952	0.991	0.97	1.055	0.845	1.041	1.106	0.888	1.057	1.14	0.981	0.946
Isomer 3 of L-2-Amino-3-methylenehexanoic acid	1.033	1.037	0.914	1.241	1.301	0.876	1.749	1.031	1.094	0.823	1.077	0.838	1.291	0.859	1.032	1.011
Isomer 3 of N(6)-Methyllysine	0.908	1.254	0.952	0.958	0.971	1.225	0.98	0.897	1.265	1.287	0.826	1.215	0.889	1.09	1.043	1.177
Isomer 4 of (2R,3R,4R)-2-Amino-4-hydroxy-3-methylpentanoic acid	1.013	1.319	1.067	1.176	0.92	0.895	1.255	1.028	1.199	1.091	1.047	0.922	1.197	0.931	0.91	0.949
Isomer 4 of 4-Chloro-L-lysine	0.581	1.19	0.848	0.76	1.024	0.772	0.823	0.823	0.949	1.002	0.917	0.901	1.021	1.129	1.133	1.409
Isomer 4 of 5-Aminopentanoic acid	1.039	0.915	1.172	1.144	1.252	0.789	1.098	0.813	0.977	1.21	1.113	1.292	1.295	1.038	1.064	0.952
Isomer 5 of (2R,3R,4R)-2-Amino-4-hydroxy-3-methylpentanoic acid	1.16	0.963	1.422	1.503	1.099	1.423	1.157	1.308	1.22	1.119	0.932	1.066	1.319	1.242	1.121	1.101
Isomer 5 of 4-Chloro-L-lysine	0.735	1.194	0.862	0.876	1.195	0.884	0.857	0.883	0.948	0.994	0.932	0.941	1.041	1.121	1.129	1.391
Isomer 6 of 4-Chloro-L-lysine	0.728	1.157	0.86	0.883	1.157	0.861	0.836	0.875	0.921	0.999	0.901	0.933	1.008	1.124	1.107	1.364
Kanosamine	1.094	1.03	0.916	0.921	1.186	1.215	1.037	0.941	0.947	0.989	0.898	0.824	0.907	1.256	0.975	1.158
Kinetin	1.147	0.758	0.865	0.645	0.539	0.924	1.362	0.874	1.087	0.722	0.847	0.899	0.954	1.329	1.205	1.049
L-2-Amino-3-methylenehexanoic acid	1.197	0.981	0.891	1.095	1.001	0.899	1.362	1.145	1.162	1.013	0.98	0.857	1.1	0.988	0.889	0.932
L-2-Amino-5-hydroxypentanoic acid	1.256	1.2	1.116	1.081	1.094	1.213	1.292	1.292	1.175	1.344	1.128	1.072	1.175	1.198	1.12	1.138
L-2-Amino-6-oxoheptanedioic acid	0.922	1.162	0.935	0.742	0.617	2.092	0.787	0.848	1.097	0.829	0.653	0.449	0.621	2.213	0.717	1.506
L-Agaridoxin	1.152	1.677	0.697	1.955	1.184	0.954	1.186	1.021	0.81	1.362	0.896	1.172	0.931	1.009	0.642	0.74
L-alpha-Aspartyl-L-hydroxyproline	1.037	0.932	0.816	1.036	1.002	0.911	1.071	1.07	1.067	1.244	1.059	1.04	1.096	0.998	1.249	1.134
L-Aspartate 4-semialdehyde	1.043	0.921	0.804	0.845	1.225	0.743	1.098	0.872	0.911	0.884	1.195	0.852	1.126	0.931	0.939	0.88
L-beta-aspartyl-L-glycine	0.994	1.035	1.015	1.012	1.093	1.031	0.98	0.888	1.22	1.123	0.899	1.069	0.896	0.853	1.043	1.025
L-Cysteic acid	1.011	0.982	1.035	1.098	0.887	1.026	0.99	0.926	0.775	1.255	0.819	0.797	0.884	1.301	0.886	1.153
L-Cysteinylglycine disulfide	1.121	1.296	1.227	1.102	1.288	1.166	0.959	1.06	1.027	0.963	1.152	0.958	1.023	1.064	0.796	0.947
L-erythro-4-Hydroxyglutamic acid / 4-Hydroxy-L-glutamic acid	1.061	1.142	0.913	1.032	1.217	1.124	1.019	0.976	1.107	1.035	1.022	1	1.071	1.097	0.987	1.224
Leucyl-Methionine sulfoxide	0.831	1.378	0.678	0.873	1.075	0.612	1.39	1.166	1.552	1.057	0.491	0.764	0.786	1.533	0.979	1.072
L-Formylkynurenine / N'-Formylkynurenine	1.133	0.795	0.871	1.426	0.545	1.03	0.812	0.893	1.053	0.809	0.984	1.085	1.17	1.121	0.984	1.172
L-Furosine	1.035	0.799	1.219	0.911	1.071	1.089	0.665	0.996	0.933	1.324	1	0.993	1.088	1.061	1.2	0.97
L-gamma-Glutamyl-(3R)-L-beta-ethynylserine	0.971	0.951	0.83	1.087	1.002	0.839	0.924	1.057	1.163	1.181	1.054	0.907	0.912	0.924	1.381	0.998
L-Isoleucine / L-Alloisoleucine	1.132	1.424	1.293	1.136	1.096	0.769	1.199	1.161	1.19	0.687	0.716	1.082	1.635	0.699	1.176	1.09
L-Ornithine / D-Ornithine	1.203	1.066	1.258	1.076	1.104	1.025	0.974	1.041	1.292	1.216	1.213	1.067	1.209	1.035	1.33	1.133
L-Phenylalanine / D-Phenylalanine	1.007	1.046	1.024	1.104	0.941	0.963	1.007	1.079	1.175	0.853	0.986	1.052	0.992	0.956	1.041	0.936
L-Serine / D-Serine	0.912	1.193	0.929	0.937	0.916	0.961	0.912	1.24	1.718	1.044	0.886	1.357	0.92	0.877	1.229	0.929
L-trans-4-Methyl-2-pyrrolidinecarboxylic acid	0.976	1.103	0.827	0.821	0.978	0.956	0.829	1.092	1.083	1.073	0.893	1.13	0.779	0.914	1.097	1.037
L-trans-5-Hydroxy-2-piperidinecarboxylic acid	0.999	0.857	1.028	0.911	0.858	1.732	0.971	1.189	1.128	1.093	1.049	0.622	0.88	1.719	0.884	1.455
L-Tyrosine	1.064	1.112	1.248	1.07	0.938	0.95	0.933	1.017	1.116	0.988	1.072	1.079	1.141	0.907	1.034	0.952
Lysyl-Glycine	1.021	0.888	1.037	0.964	0.902	0.974	0.869	0.886	0.986	1.213	0.82	0.926	0.887	0.977	0.917	1.145
m-Aminobenzoic acid	1.09	0.802	0.905	1.005	0.803	1.045	1.016	0.9	0.98	0.922	1.072	0.952	0.917	0.878	1.181	0.888
Mesalazine	1.287	0.793	1.159	1.363	0.938	1.655	1.002	0.801	0.75	1.272	1.219	0.87	1.141	0.884	1.153	1.332
Methionyl-Glutamic acid	1.028	0.971	1.44	1.008	0.982	0.855	1.164	1.154	0.803	0.874	1.169	0.767	0.788	0.887	0.804	0.671
Morpholine	1.056	1.248	1.18	1.13	1.034	1.025	1.048	1.055	0.886	0.96	1.124	0.9	1.085	1.15	1.177	0.942
N(6)-Methyllysine	1.019	1.496	1.362	1.041	0.917	0.815	1.124	0.961	1.265	0.477	0.527	0.944	1.605	0.616	1.19	1.068
N(gamma)-Acetyldiaminobutyric acid	1.322	0.967	0.976	1.039	1.053	1.08	1.105	1.037	0.947	1.102	1.008	0.989	1.159	1.18	1.101	1.197
N2-Acetyl-Cysteinyldopa	1.252	0.902	0.946	0.812	0.957	1.092	1.064	0.867	0.751	1.101	1.023	1.94	0.688	0.664	1.089	0.955
N5-Acetyl-L-Ornithine	1.062	0.924	0.769	0.862	1.104	0.83	1.151	0.948	0.762	0.923	0.938	1.13	1.096	1.01	1.204	1.088
N6-(Delta2-Isopentenyl)-adenine	0.923	0.646	0.479	0.553	0.492	1.021	0.535	0.739	0.797	0.658	0.884	0.541	0.459	1.928	0.529	1.43
N6-(L-1,3-Dicarboxypropyl)-L-lysine	1.008	1.151	1.064	0.667	0.689	1.377	1.113	0.867	1.032	1	0.846	0.738	0.89	1.64	0.911	1.014
N6-beta-Aspartyllysine	1.177	1.093	1.237	0.972	1.16	0.96	1.005	0.976	0.949	0.938	0.988	0.94	0.976	1.117	1.101	0.996
N6-Methyladenosine	0.942	1.116	1.155	1.098	0.937	1.427	1.031	1.086	0.958	1.003	1.001	0.675	0.95	1.515	0.911	1.013
N-Acetyl-3,4-Dihydroxy-L-phenylalanine	1.613	0.795	1.131	0.939	0.776	1.243	0.883	1.055	0.81	1.199	1.332	0.856	1.164	0.948	1.024	1.298
N-Acetyl-Dopamine	1.128	1.044	1.43	1.306	1.418	1.949	1.169	1.045	1.45	1.214	1.351	1.683	1.107	1.161	1.082	1.439
N-Acetylindoxyl	0.971	0.754	1.063	0.801	0.678	0.792	0.946	0.756	0.882	0.921	0.851	0.932	0.766	0.932	0.998	0.982
N-Acetyl-N(omega)-Hydroxyarginine	1.155	0.849	0.887	1.336	0.961	0.945	1.001	1.424	1.086	0.933	1.142	0.952	1.037	0.778	1.099	0.673
N-Acetyl-Tyramine	1.082	1.095	0.801	0.947	0.974	1.664	1.09	1.164	0.982	1.397	1.235	1.084	1.246	0.859	1.526	1.023
N-Carboxyethyl-g-aminobutyric acid	1.195	1.15	1.045	0.945	1.158	0.724	0.979	1.002	1.128	0.927	1.245	1.04	0.972	1.04	1.031	0.913
N-Ethylglycine	1.031	1.104	0.913	1.054	1.438	1.02	1.208	1.047	1.104	1.144	1.343	0.84	1.271	0.949	0.909	1.064
N-Formimino-L-glutamic acid	0.613	1.228	1.186	0.717	0.964	0.655	1.044	1.003	1.14	1.199	1.142	1.205	0.984	0.97	1.076	0.976
N-Hydroxy-L-tyrosine	1.096	1.213	1.337	1.111	1.529	1.136	0.83	0.871	1.548	1.376	0.77	1.894	1.13	0.918	1.154	1.161
N-Methyl aspartic acid	1.057	1.232	0.857	1.005	0.946	1.066	1.075	0.928	1.173	0.982	1.143	0.961	0.936	1.119	1.143	1.256
Nopaline	1.213	1.251	1.452	1.043	1.034	0.979	0.819	1.152	1.078	0.958	1.196	0.99	1.013	0.953	1.231	0.853
Norsalsolinol	1.079	1.162	1.083	1.244	1.029	1.07	1.057	1.162	1.167	1.022	1.003	1.198	1.138	1.077	1.102	1.053
O-Acetyl-L-serine	0.936	1.492	0.86	1.122	0.747	1.447	0.975	1.045	1.132	0.904	0.89	0.926	0.735	0.968	1.011	1.108
O-Methyl-L-threonine	1.176	1.138	1.144	1.276	1.313	1.223	1.357	1.277	0.951	1.193	1.077	1.505	0.997	1.017	1.125	1.248
O-Ureidohomoserine	0.916	0.794	0.932	0.82	0.961	0.838	0.93	0.833	0.84	1.153	0.869	0.888	1.264	0.847	1.096	0.893
Oxypinnatanine	0.961	1.381	0.784	1.047	1.238	0.704	1.174	1.256	1.578	1.101	0.504	1.029	0.885	1.332	1.088	1.121
para-Trifluoromethylphenol	1.082	0.912	0.754	0.834	1.459	1.224	1.215	0.372	1.278	1.115	1.899	0.686	1.571	0.683	0.805	0.702
Penmacric acid	0.822	0.589	0.994	1.38	0.944	0.807	1.259	0.916	0.854	1.06	1.081	0.796	1.071	1.218	0.901	1.052
Phenol	1.172	1.242	1.012	1.281	1.085	0.96	1.114	1.122	1.249	1.092	1.065	1.185	1.271	1.141	1.188	1.113
Phloroglucinol	0.841	1.371	0.903	1.163	1.273	1.163	0.938	1.037	1.002	0.989	1.06	1.065	1.21	1.155	1.025	1.595
p-Hydroxyphenylacetylglycine	1.261	0.93	1.178	0.898	0.925	1.087	0.903	0.84	1.145	0.988	1.357	1.277	1.162	1.127	0.99	1.112
Porson	0.964	1.038	1.419	1.2	0.878	0.842	1.067	1.128	1.168	0.928	1.199	1.213	1.126	0.986	0.925	1.013
Prolyl-Gamma-glutamic acid	0.9	1.007	1.252	0.815	1.065	1.041	0.941	0.958	0.948	1.128	0.984	0.898	1.13	1.058	1.067	1.055
Prolylhydroxyproline / Prolyl-Hydroxyproline	1.14	0.912	0.919	0.629	0.828	0.802	0.972	0.813	1.217	0.937	0.882	1.21	0.859	1.177	1.038	1.106
Pyrimidodiazepine	0.871	0.992	0.879	1.023	0.989	1.024	0.909	0.862	1.031	0.906	0.841	0.935	0.899	1.023	1.002	1.398
Pyrrolidine	1.414	1.441	0.944	1.78	1.35	0.95	1.405	1.061	0.93	1.236	0.875	0.983	1.244	1.394	1.161	1.322
Resveratrol	1.405	1.074	0.818	1.348	0.778	0.682	1.04	0.676	0.84	0.616	0.704	1.237	1.209	0.778	0.874	0.773
Rhapontigenin	1.122	0.85	1.238	1.082	1.127	0.773	0.993	1.082	1.214	0.928	0.528	1.171	0.966	0.819	0.998	0.727
Salsoline-1-carboxylic acid	1.248	1.166	1.421	1.385	0.946	1.044	1.265	1.271	0.769	0.814	1.396	0.923	1.126	0.963	0.998	0.829
Salsolinol 1-carboxylic acid	1.115	1.219	1.171	1.089	0.922	0.972	1.074	1.626	1.596	0.956	1.235	1.554	1.114	0.808	1.243	0.855
S-Cysteinosuccinic acid	1.173	0.923	0.882	0.97	1.031	1.109	0.834	0.877	0.803	1.082	0.975	1.071	1.062	0.98	1.153	1.037
Seryl-Proline	0.944	1.148	0.829	0.911	1.066	0.877	1.045	1.133	1.345	1.012	0.774	0.927	0.773	1.212	1.008	1.073
S-Glutathionyl-L-cysteine - 2 tags / Cysteineglutathione disulfide	1.025	0.985	1.196	0.922	1.302	0.759	0.848	1.018	0.857	0.831	0.916	0.646	0.845	1.202	0.891	0.768
sn-Glycero-3-phosphoethanolamine	0.813	1.186	0.889	0.858	1.212	1.226	1.142	1.168	1.124	1.255	0.882	1.074	1.018	1.229	0.762	1.066
Spermic acid 2	1.035	0.952	0.931	0.689	1.012	0.663	0.656	0.828	0.799	0.933	0.662	1.073	0.771	0.613	0.917	0.859
Sphingosine	0.973	1.261	0.967	1.557	0.829	1.082	0.916	0.944	0.935	0.654	0.505	0.872	1.109	0.753	0.739	1.359
Suillusin	1.222	0.777	0.487	1.017	0.689	0.53	0.951	0.996	0.755	0.863	0.688	1.009	0.919	1.02	1.013	0.82
Taurine	0.966	0.884	1.239	0.897	1.524	1.85	0.659	0.778	0.996	0.897	0.755	0.751	0.651	1.322	0.942	0.887
Tetrahydrobiopterin - 2 tags / L-threo-Tetrahydrobiopterin	0.905	0.675	1.019	0.695	0.808	0.708	0.888	0.868	1.124	1.285	0.745	1.155	0.641	0.745	1.016	0.917
Threoninyl-Histidine	0.99	1.072	0.73	0.759	1.448	0.907	0.673	1.099	1.035	1.106	0.735	1.224	1.587	1.14	1.106	1.408
Threoninyl-Hydroxyproline	1.008	0.75	0.62	0.642	0.944	0.774	1.308	0.943	1.608	1.029	1.08	1.552	1.39	0.895	1.281	1.11
trans-2,3-Dihydroxycinnamic acid	1.111	1.271	1.288	1.366	1.177	1.487	1.116	1.538	1.097	1.183	1.589	1.147	1.34	1.165	1.092	1.293
trans-S-(1-Propenyl)-L-cysteine	1.168	1.091	0.704	0.743	0.987	0.714	1.34	1.063	1.084	1.016	1.079	1.057	1.07	0.87	0.827	1.083
Trihomomethionine	0.757	0.948	0.604	1.039	0.882	0.976	0.652	0.609	0.774	0.698	0.691	0.813	0.666	0.911	0.724	0.774
Valyl-Asparagine	0.971	0.642	0.884	0.849	1.476	0.7	1.377	1.033	0.917	0.876	0.785	1.037	1.028	0.86	1.143	1.195
Valyl-Histidine	1.118	0.564	0.982	1.008	1.145	0.892	1.688	1.85	1.148	0.565	1.245	0.779	1.735	1.434	1.1	0.703
Valyl-Hydroxyproline	1.202	1.055	1.28	1.022	1.318	1.203	1.254	1.157	0.891	1.154	1.434	1.079	1.05	1.024	1.019	1.156
Vanillactic acid	2.808	0.83	0.83	0.679	0.744	1.219	0.931	0.849	1.003	0.939	0.611	0.838	1.361	1.281	1.247	1.434
